# Supplementary material
Source: MDPI journal article supplement (https://www.mdpi.com/2073-4352/13/1/152)
Supplement: s1 [file s1 › crystals-2145726-supplementary.pdf]

## Supporting information

# Evaluation of $\text{La}_{1-x}\text{Sr}_x\text{Ni}_{0.4}\text{Fe}_{0.6}\text{O}_{3-\delta}$ as Electrode Materials for Direct Methane Symmetrical Solid Oxide Fuel Cells

Caixia Shi <sup>1,2</sup>, Ting Chen <sup>1,\*</sup>, Dongyang Fang <sup>3</sup> and Shaorong Wang <sup>1,\*</sup>

<sup>1</sup> School of Chemistry and Chemical Engineering, China University of Mining and Technology, Xuzhou 221116, China

<sup>2</sup> Xinyi Proton Hydrogen Energy Storage Research Institute, Xuzhou 221400, China

<sup>3</sup> Jiangxi Saici Materials Co., Ltd., Jiujiang 332503, China

\* Correspondence: chenting@cumt.edu.cn (T.C.); srwang@cumt.edu.cn (S.W.)

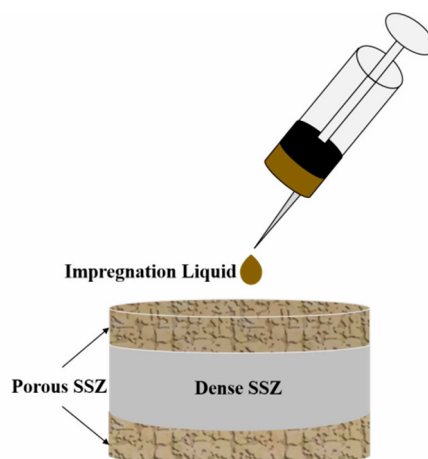

Figure S1 The skeleton of the symmetrical porous SSZ/ dense SSZ/ porous SSZ with LSNF9146 or LNF46 nano particles.

Figure S1 illustrates the fabrication process of SSOFC. The Sandwich skeleton of SSZ with the dense layer in the middle was prepared by tape casting, lamilating and co-sintering.

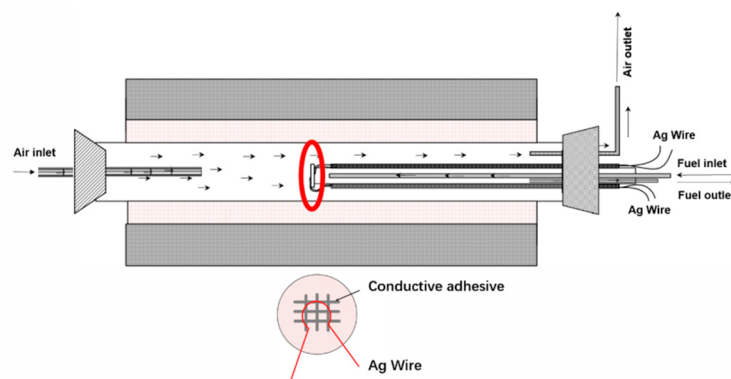

Figure S2 The experimental setup of SSOFC

The button cell was sealed on the alumina tube, then it was set into a quartz tube, with one side exposed to the air oxidant and the other side to the fuel ( $\text{CH}_4$ ).
